# Supplementary material for: Facile synthesis of V4+-doped and graphene-decorated V2O5/biomass carbon nanocomposite using graphene quantum dots for supercapacitors with wide voltage window and high energy density
Source: Royal Society of Chemistry journal article supplement (doi:10.1039/d3nj03748g), 2023-01-01
Supplement: d3nj03748g1.pdf [file d3nj03748g1.pdf]

# Facile synthesis of V<sup>4+</sup>-doped and graphene-decorated V<sub>2</sub>O<sub>5</sub>/biomass carbon nanocomposite using graphene quantum dot for supercapacitors with wide voltage window and high energy density

Yang Chen,<sup>a</sup> Li Ruiyi,<sup>a</sup> Li Zaijun,\*<sup>a</sup> Cai Tongxiang,<sup>b</sup> Yang Yongqiang<sup>c</sup> and Liu Xiaohao\*<sup>a</sup>

<sup>a</sup> School of Chemical and Material Engineering, School of Life Science and Health Engineering, Jiangnan University, Wuxi 214122, China

<sup>b</sup> Yadea Technology Group Co., Ltd, Wuxi 214000, China

<sup>c</sup> National Graphene Products Quality Supervision and Inspection Center (Jiangsu), Jiangsu Province Special Equipment Safety Supervision Inspection Institute· Branch of Wuxi, Wuxi 214174, China

## 1. Experimental

### 1.1. Materials and reagents

Citric acid (CA), serine (Ser), histidine (His) and boric acid (H<sub>3</sub>BO<sub>3</sub>) were purchased from Sinopharm Chemical Reagent Co., Ltd (Shanghai, China). NH<sub>4</sub>VO<sub>3</sub> was purchased from Aladdin. Silver nanowires (Ag NW) in isopropanol (5 mg mL<sup>-1</sup>) was purchased from Jiangsu XFNANO Materials Tech Co., Ltd. B/GQD was prepared according to reported in the literature. The solid electrolyte (PVA/Li<sub>2</sub>SO<sub>4</sub>) was prepared by adding 2.0 g polyvinyl alcohol (PVA) and 10 mL of 3 mol L<sup>-1</sup> Li<sub>2</sub>SO<sub>4</sub> solution in 20 mL ultrapure water and then heated at 75°C with stirring until a clear homogeneous solution was formed. Rambutan was purchased from Hainan Province and then rambutan peel was collected, followed by washing in distilled water and freeze-dried for use.

### 1.2. Material characterization

The morphology and structure of as-synthesized materials was characterized by scanning electron microscope (SEM, JEOL, S-4800) and transmission electron microscope (TEM, JEOL, Jem-2100). The crystal structure and chemical composition of as-synthesized materials was studied by X-ray diffraction (XRD, Bruker D8 ADVANCE, Cu K $\alpha$  radiation,  $\lambda = 0.15406$  nm). The valence states of as-synthesized materials were characterized by X-ray photoelectron spectroscopy (XPS, Kratos, Axis supra) with mono chromated Al KR radiation. The band gap of as-synthesized materials was evaluated by obtaining UV-visible diffuse reflectance spectra by UV-visible spectrophotometer (UV-vis, Shimadzu, UV-3600 Plus). The oxygen vacancies of as-synthesized materials were characterized by the electron paramagnetic resonance spectra (EPR, Bruker EMX PLUS, X-band $\approx$ 9.8 GHz). The morphology of rambutan peel was characterized by ultra-depth three-dimensional microscope (Keyence, VHX-1000C).

### ***1.3 S/H-GQD-B synthesis***

S/H-GQD-B was synthesized using one reported procedure.<sup>1</sup> In a typical synthesis, 0.1 mole of citric acid, 0.1 mole of histidine, 0.02 mole of serine and 0.02 mole of H<sub>3</sub>BO<sub>3</sub> were mixed in in 50 mL deionized water. The solution was heated at 90°C under stirring until all free water molecules were removed from the system. Followed by thermal treatment at 180°C for 3 h. The formed S/H-GQD-B crude product was dispersed in ultrapure water to form 100 mg mL<sup>-1</sup> S/H-GQD-B solution. Adjusted its acidity to pH 7.0 by dropping 1 mol L<sup>-1</sup> NaOH solution, dialyzed in dialysis bag with molecular weight cut-off of 3000 Da and freeze-dried. The resultant S/H-GQD-B solid was stored in dark at 4°C before use.

### ***1.4 Electrochemical measurements***

The three-electrode testing system and flexible symmetrical supercapacitor were employed for

evaluating electrochemical performance of V<sub>2</sub>O<sub>5</sub>-S/H-GQD-B/BC. The three-electrode testing system consists of titanium sheet working electrode (1cm×1cm) bearing V<sub>2</sub>O<sub>5</sub>-S/H-GQD-B/BC, platinum foil counter electrode (1cm×1cm), saturated calomel reference electrode and 1.0 mol L<sup>-1</sup> Li<sub>2</sub>SO<sub>4</sub> electrolyte. To prepare working electrode, V<sub>2</sub>O<sub>5</sub>-S/H-GQD-B/BC (90 wt.%), carbon black (5 wt.%) and polyvinylidene difluoride (PVDF)(5 wt.%) were dispersed in N-methyl-2-pyrrolidinone and homogenized on one ball mill for 24 h to form stable paste. The paste containing 1-5 mg of active mass was coated on the titanium sheet surface, dried for 24 h and pressed under 5 MPa in sequence.

Cyclic voltammogram (CV), chronoamperometry (CA), electrochemical impedance spectroscopy (EIS) and galvanostatic charge/discharge curves were carried out on CHI 660D electrochemical workstation. For EIS measurements the potential amplitude of ±5 mV and frequency of 0.01-10<sup>5</sup> Hz were adopted. The specific capacitance of single electrode in three-electrode testing system ( $C_g$ ) were calculated by according to the equation (1).<sup>2</sup> In the equation,  $C_g$ ,  $I$ ,  $m$ ,  $\Delta V$  and  $t$  presents the gravimetric capacitance (F g<sup>-1</sup>), current (A), the active mass (g), potential range (V) and discharging time (s), respectively.

$$C_g = \frac{It}{m\Delta V} \quad (1)$$

The specific capacitance ( $C_{g2}$ ), energy density and power density of symmetric supercapacitor can be calculated by according to the equations (2, 3 and 4).<sup>2</sup> The  $C_{g2}$  presents the gravimetric capacitance (F g<sup>-1</sup>) of a single electrode.  $E_g$  (W h g<sup>-1</sup>) and  $P_g$  (W g<sup>-1</sup>) present the gravimetric energy density and gravimetric power density basing on the total active material in the cell, respectively.  $I$ ,  $\Delta V$  and  $t$  present the current (A), the active mass of active material in single electrode (g), potential range and discharging time (s).

$$C_{g2} = \frac{2It}{m\Delta V} \quad (2)$$

$$E_g = \frac{C_{g2}\Delta V^2}{8 \times 3.6} \quad (3)$$

$$P_g = \frac{E_{g2} \times 3600}{t_{discharge}} \quad (4)$$

## References

1. N. Wang, R. Y. Li, Q. S. Wang, Y. Q. Yang, N. N. Li, Z. J. Li, *New J. Chem.*, 2021, **45** (37), 17258-17265.
2. Y. Dai, L. P. Ma, J. Q. Hu, J. H. Wang, H. Yan, H. Y. Zhang, H. Q. Wang, C. Y. Lai, W. R. Li, J. C. Zheng, *Electrochim. Acta.* 2021, **371** (1),137792.
